# Supplementary material
Source: Springer Nature journal article supplement (https://www.springermedizin.de/resource/supplementary/13063_2013_1516_MOESM1_ESM.pdf/9620212)
Supplement: MOESM1 [file 9620212]

## Enrollment

Assessed for eligibility (n=)

Excluded (n=)

- Not meeting inclusion criteria (n=)
- Declined to participate (n=)
- Other reasons (n=)

Randomized (n=)

## Allocation

Allocated to intervention (n=)

- Received allocated intervention (n=)
- Did not receive allocated intervention (n=)

Allocated to intervention (n=)

- Received allocated intervention (n=)
- Did not receive allocated intervention (n=)

Lost to follow-up (n=)

Discontinued intervention (n=)

Lost to follow-up (n=)

Discontinued intervention (n=)

## Analysis

Analysed (n=)

- Excluded from analysis (n=)

Analysed (n=)

- Excluded from analysis (n=)
